# Supplementary material
Source: PubMed Central journal article supplement (PMC3705565)

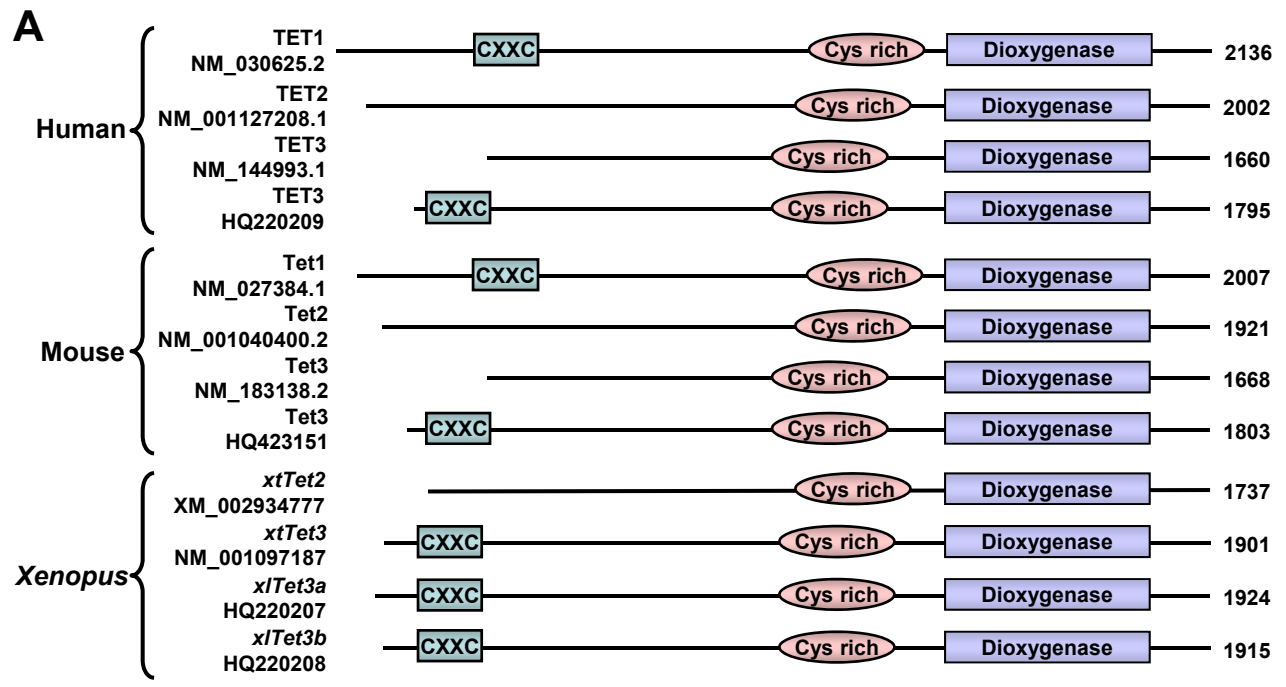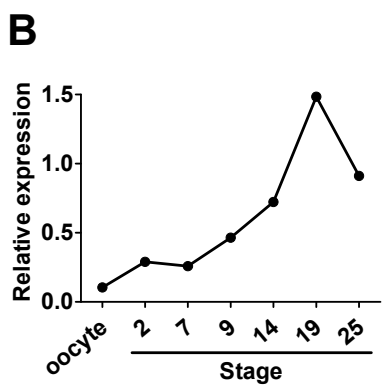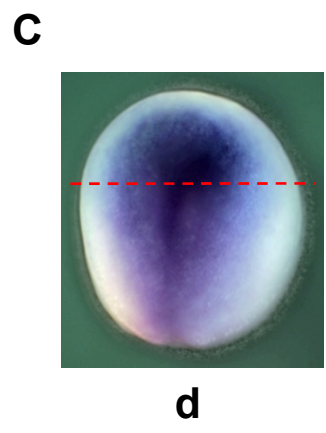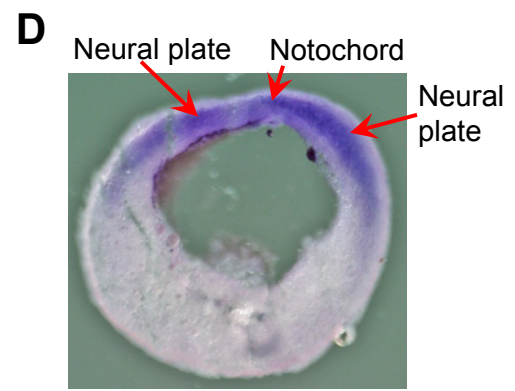

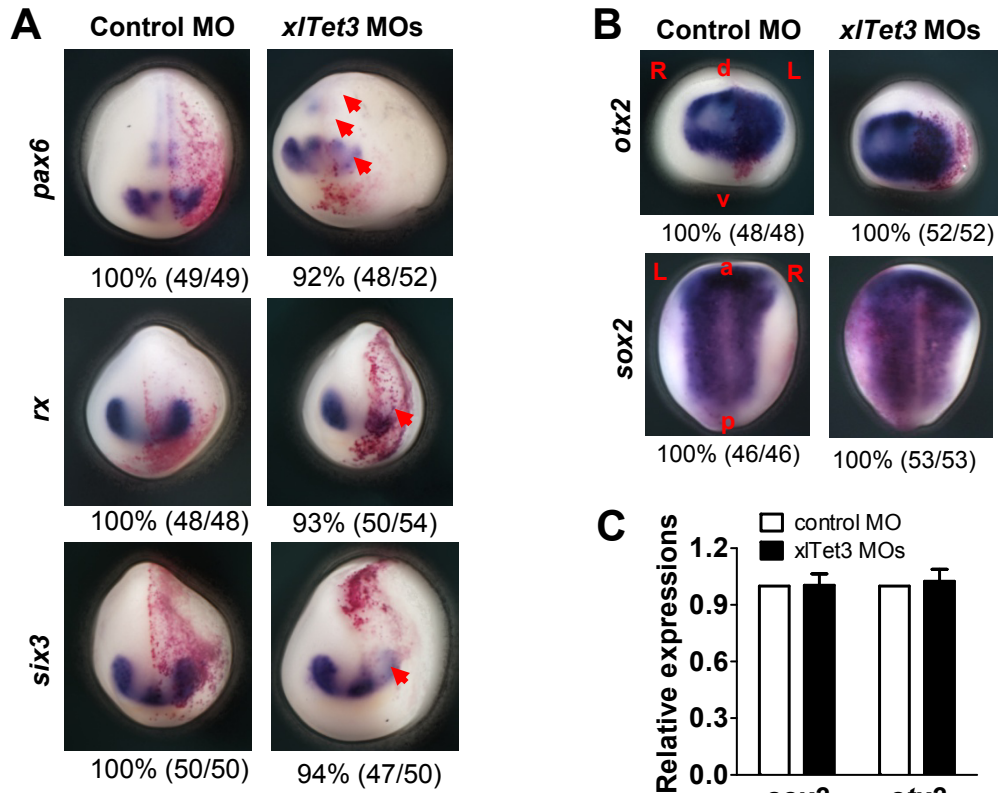

**D**

| Group                              | Normal      | Partial defect | Complete defect | Total |
|------------------------------------|-------------|----------------|-----------------|-------|
| <i>xI</i> Tet3 MOs                 | 4% (n=7)    | 11% (n=23)     | 85% (n=171)     | 201   |
| <i>xI</i> Tet3 MOs/ <i>xt</i> Tet3 | 62% (n=121) | 18% (n=36)     | 20% (n=38)      | 195   |
| <i>xI</i> Tet3 MOs/ <i>pax6</i>    | 3% (n=6)    | 14% (n=26)     | 83% (n=156)     | 188   |
| <i>xI</i> Tet3 MOs/ <i>rx</i>      | 4% (n=7)    | 11% (n=21)     | 85% (n=162)     | 190   |
| <i>xI</i> Tet3 MOs/ <i>shh</i>     | 3% (n=6)    | 12% (n=22)     | 85% (n=160)     | 188   |



**A**

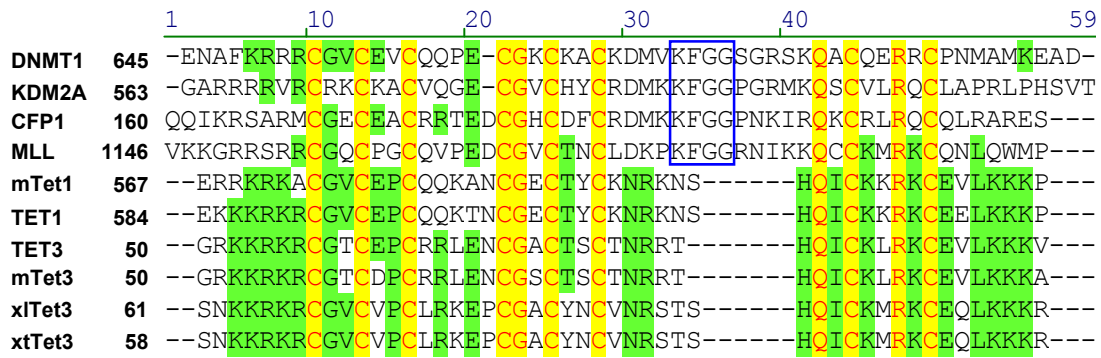

**B**

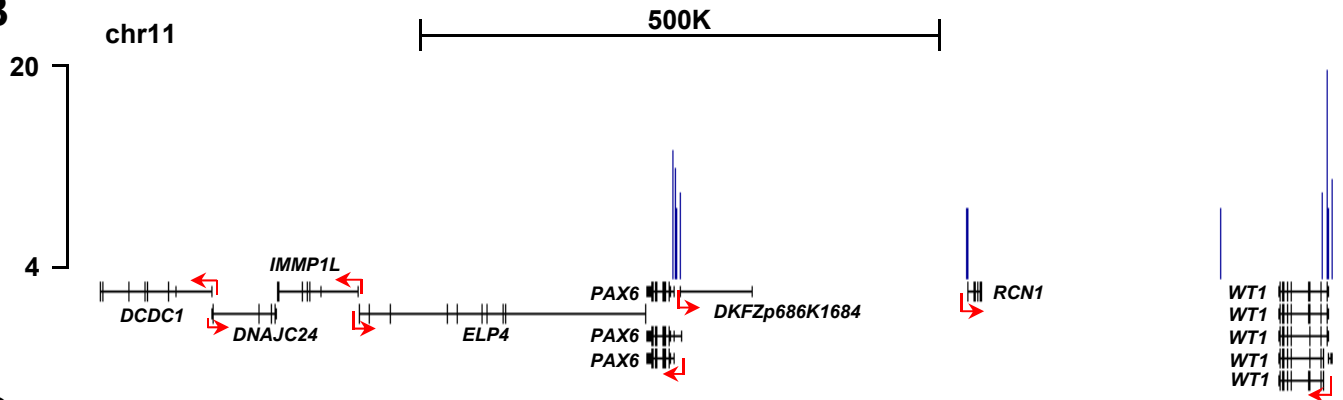

**C**

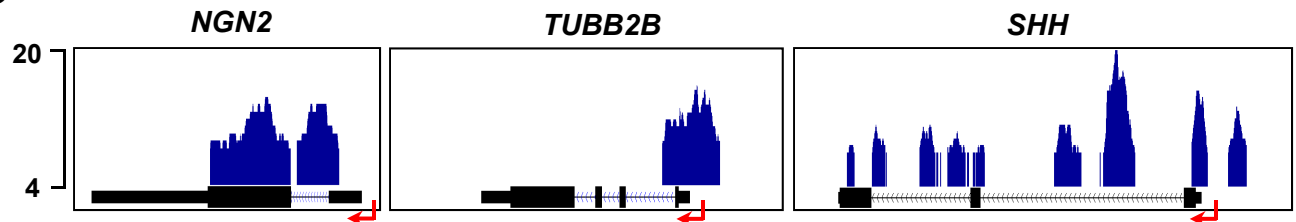

**D**

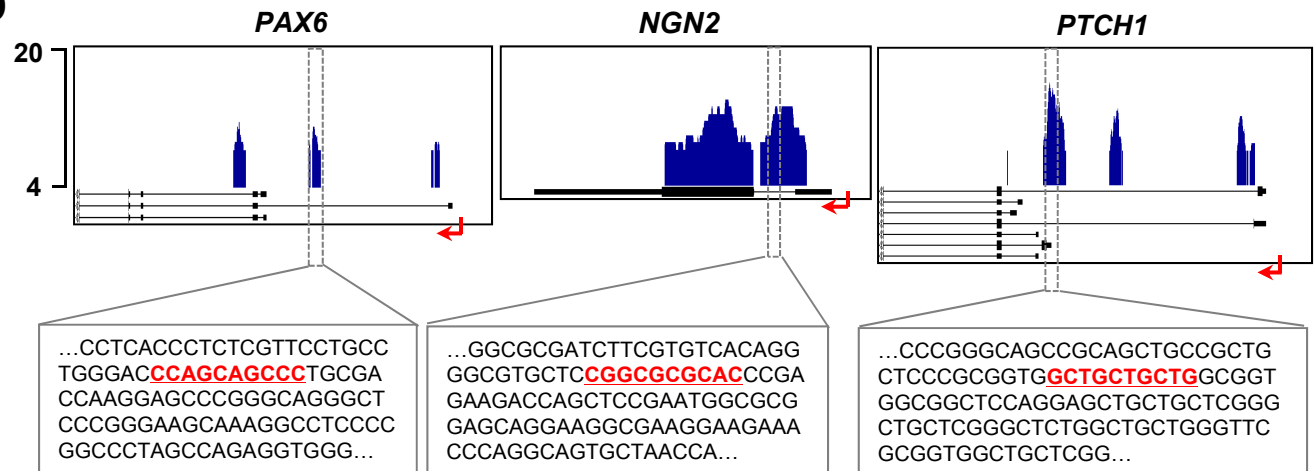

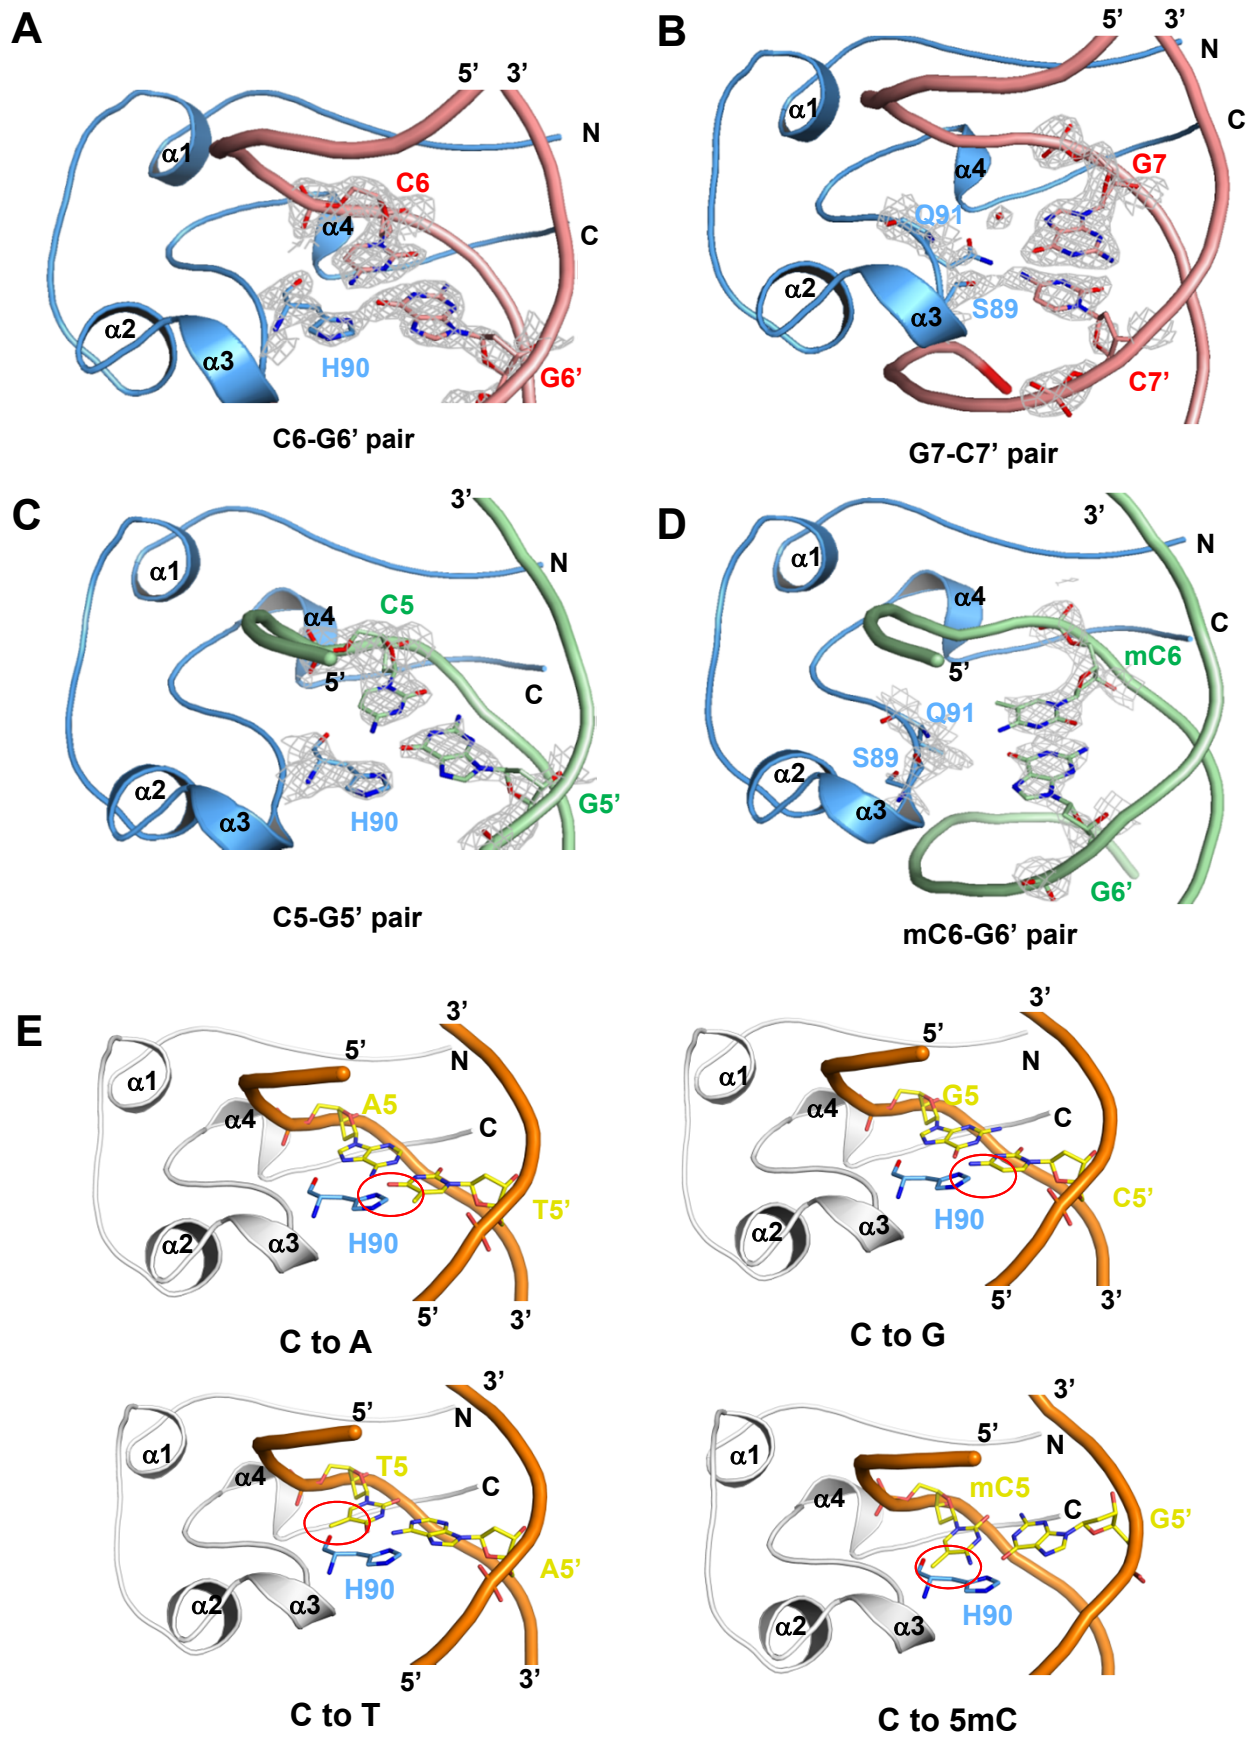

A

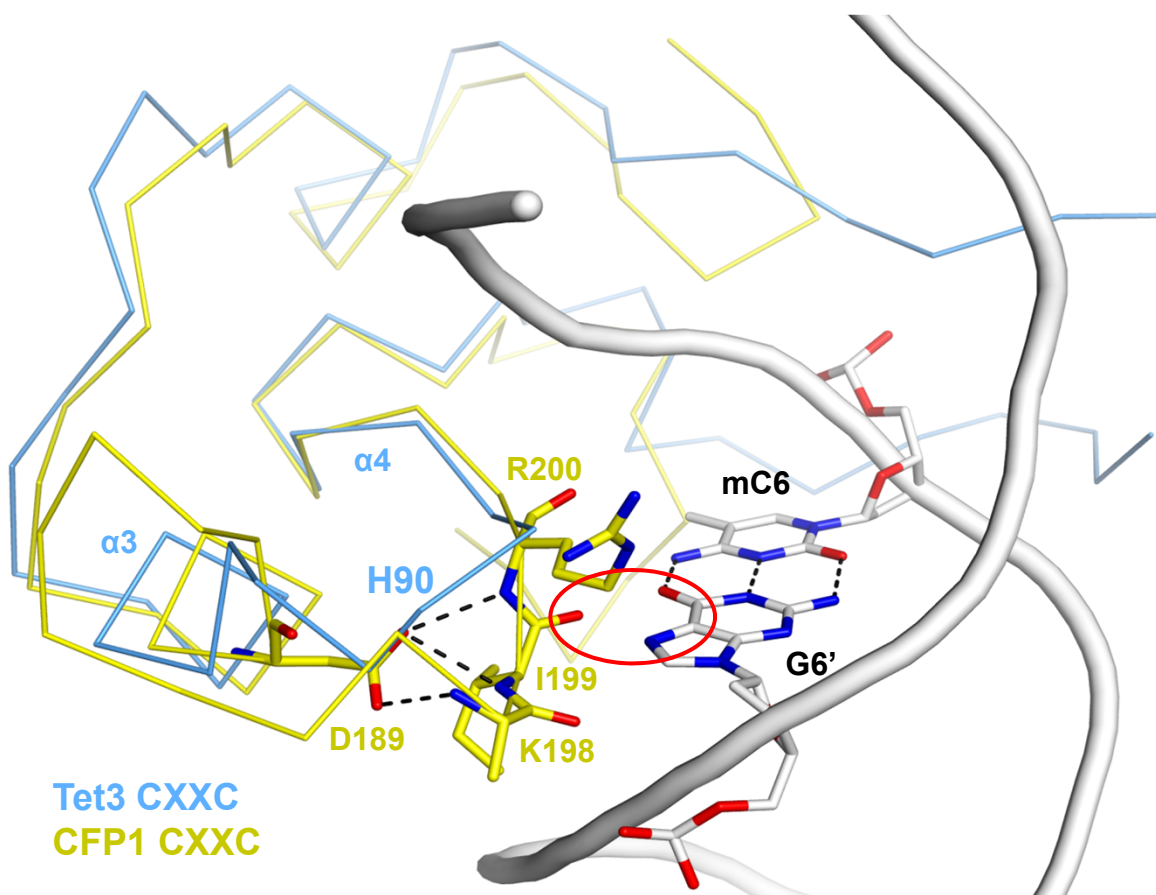

B

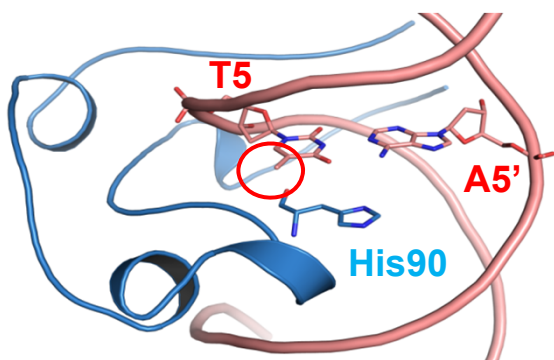

TCGA DNA

C

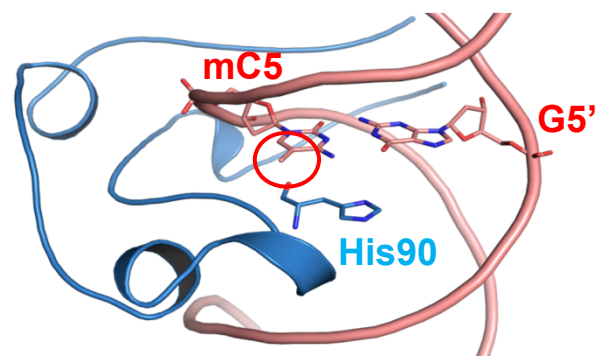

mCCGG DNA

D

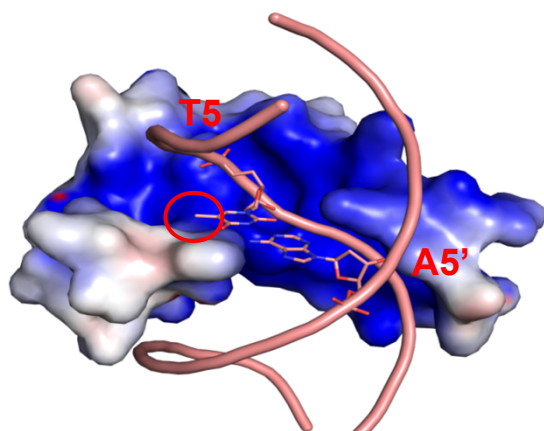

E

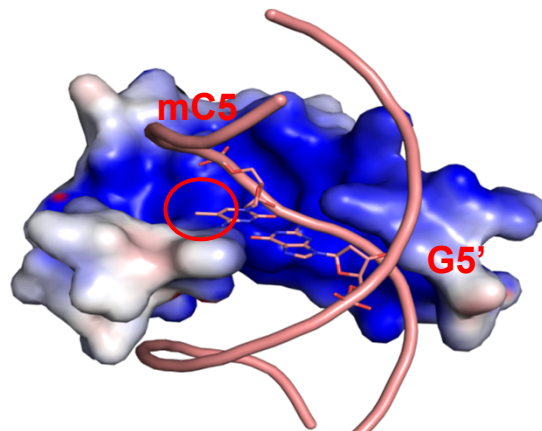

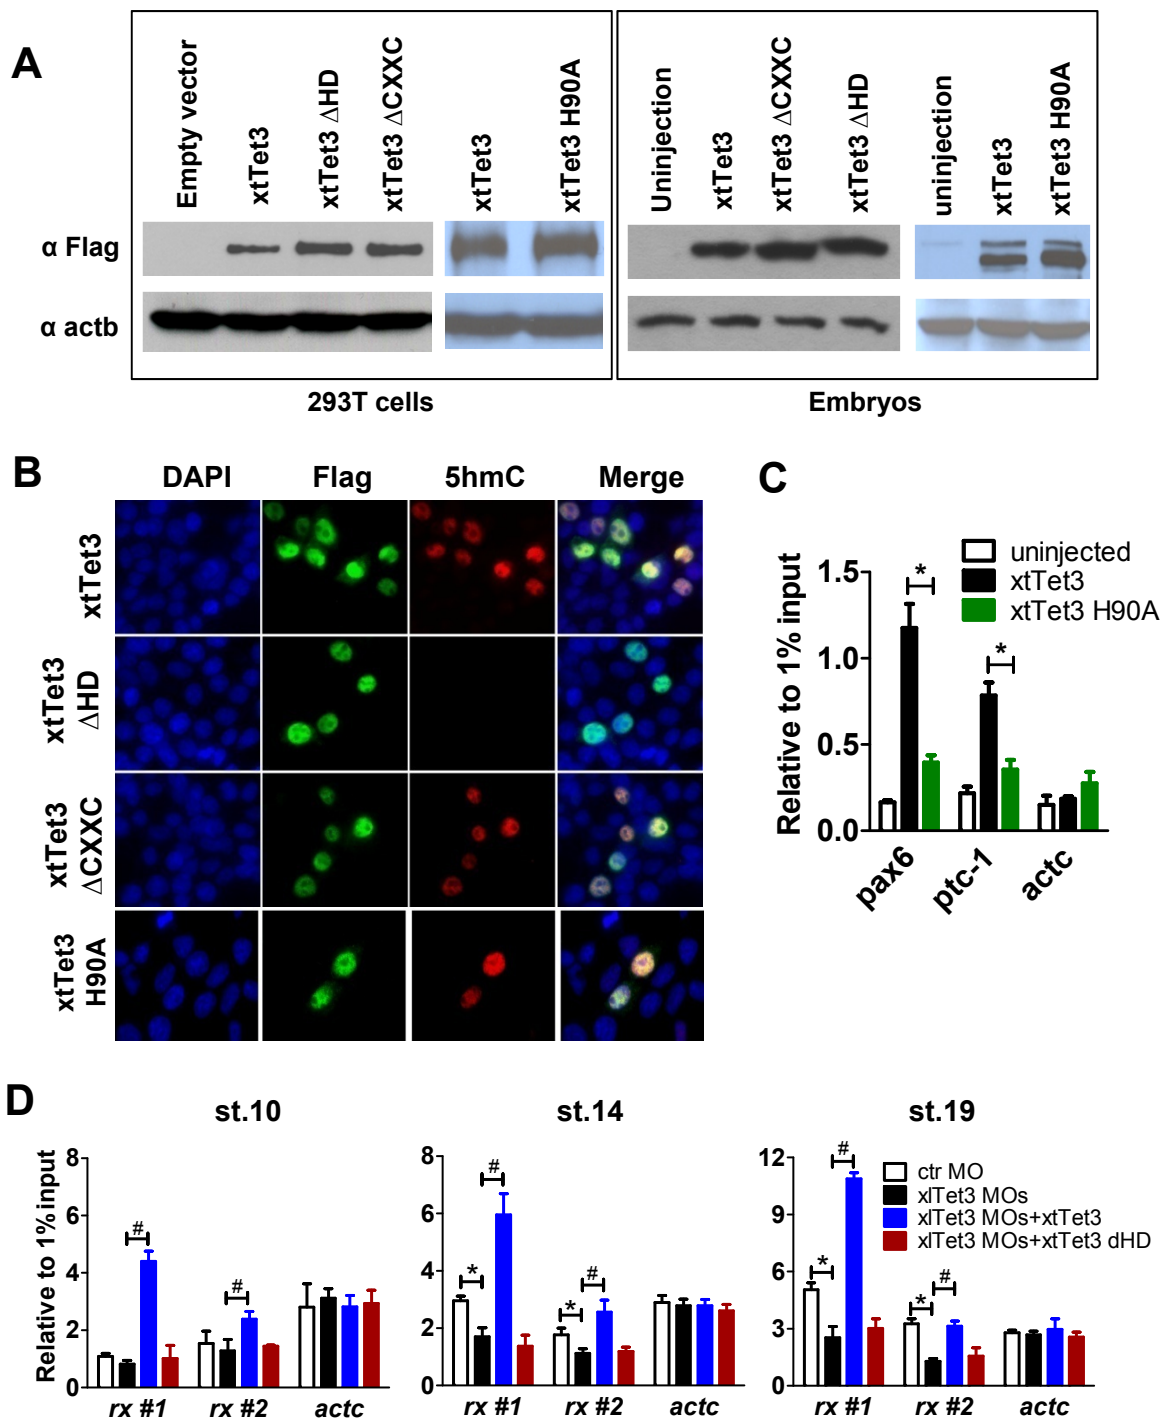

Supplement: NIHMS423101-supplement-02.pdf [file NIHMS423101-supplement-02.pdf]
